# Supplementary material for: Acid-sensitive stable polymeric micelle-based oxidative stress nanoamplifier as immunostimulating anticancer nanomedicine
Source: Royal Society of Chemistry journal article supplement (doi:10.1039/d3bm00770g), 2023-01-01
Supplement: d3bm00770g1.pdf [file d3bm00770g1.pdf]

# **Acid-sensitive stable polymeric micelle-based oxidative stress nanoamplifier as immunostimulating anticancer nanomedicine**

Gayoung Kwon<sup>a</sup>, Jinsu Baek<sup>b</sup>, Nuri Kim<sup>a</sup>, Soonyoung Kwon<sup>a</sup>, Nanhee Song<sup>a</sup>, Seong-Cheol Park<sup>c</sup>, Byeong-Su Kim<sup>b</sup>, Dongwon Lee<sup>a,d,\*</sup>

<sup>a</sup> Department of Bionanotechnology and Bioconvergence Engineering, Jeonbuk National University, Jeonju, Jeonbuk 54896, Korea

<sup>b</sup> Department of Chemistry, Yonsei University, Seoul, 03722, Korea

<sup>c</sup> Department of Polymer Engineering, Sunchon National University, Chonnam, 57922, Korea

<sup>d</sup> Department of Bionanotechnology and Bioconvergence Engineering, Jeonbuk National University, Jeonju, Jeonbuk 54896, Korea

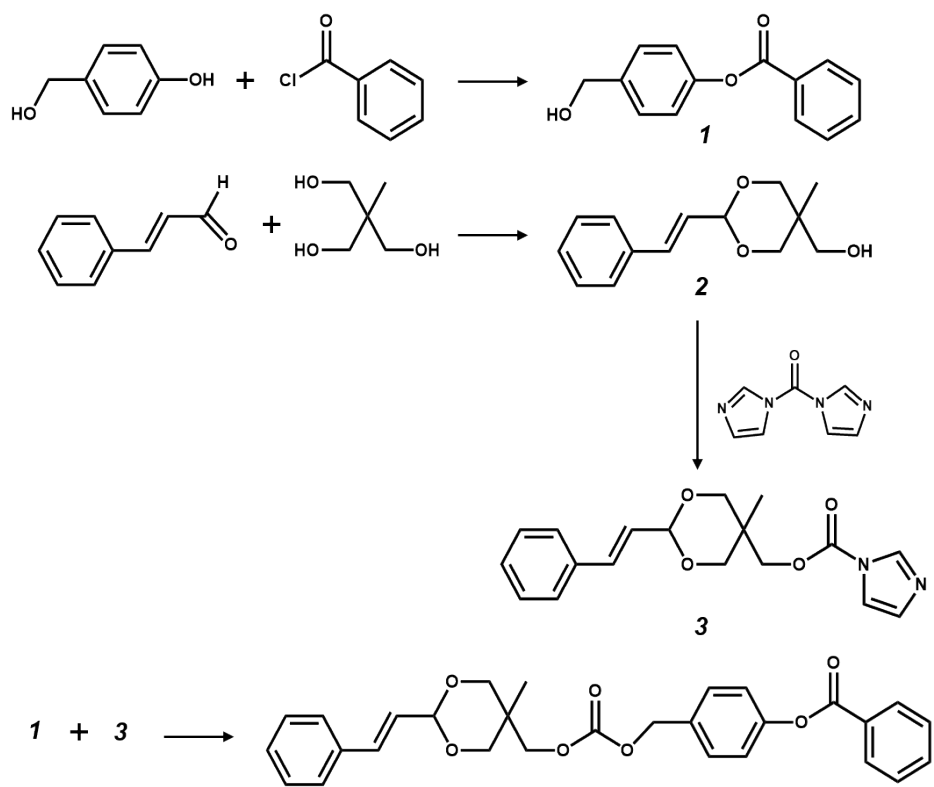

Figure S1. A synthetic route of OSamp.

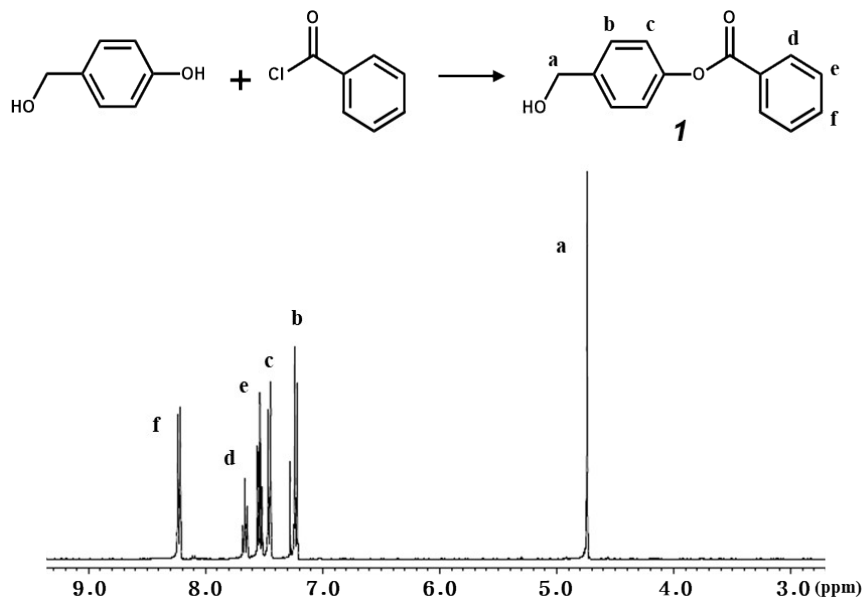

Figure S2. <sup>1</sup>H NMR spectrum of compound **1**.

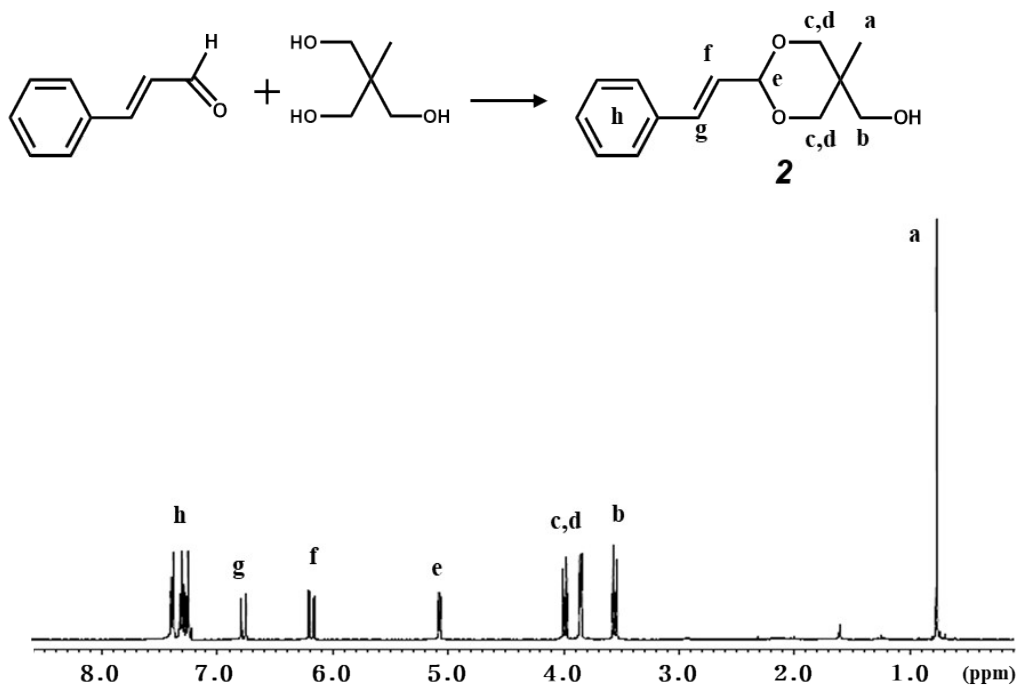

Figure S3. <sup>1</sup>H NMR spectrum of compound **2**.

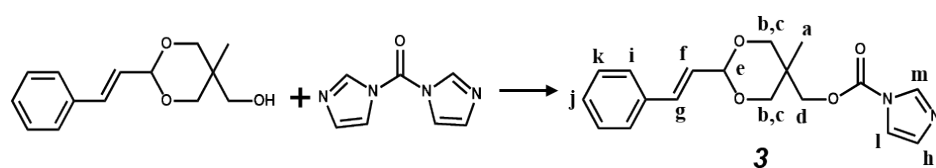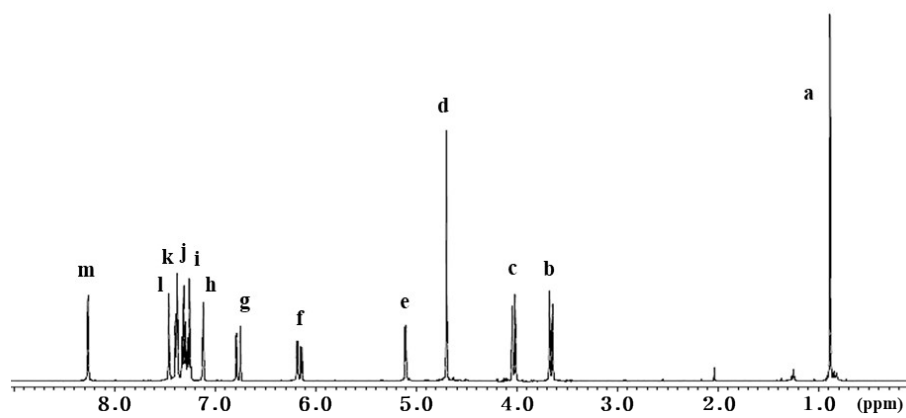

Figure S4.  $^1\text{H}$  NMR spectrum of compound **3**.

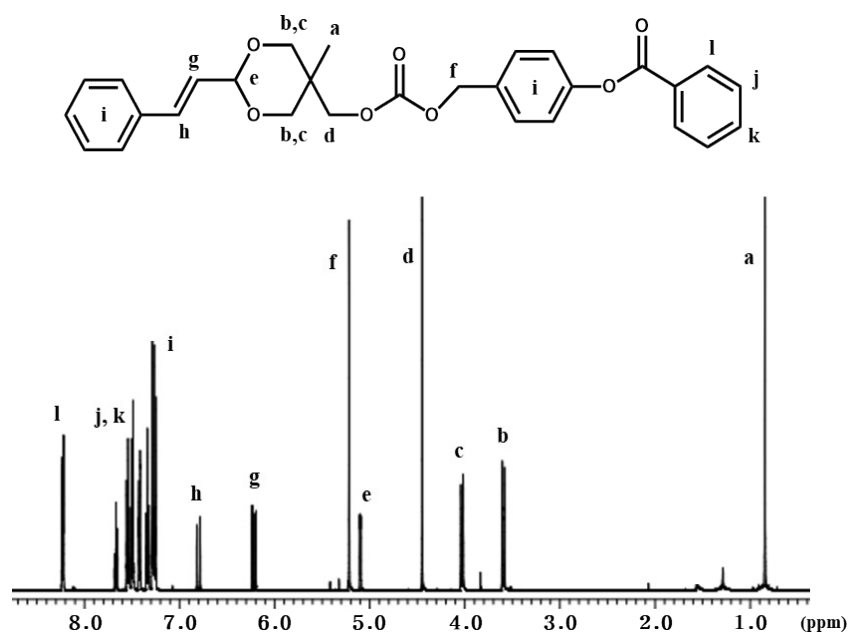

Figure S5. <sup>1</sup>H NMR spectrum of OSamp.

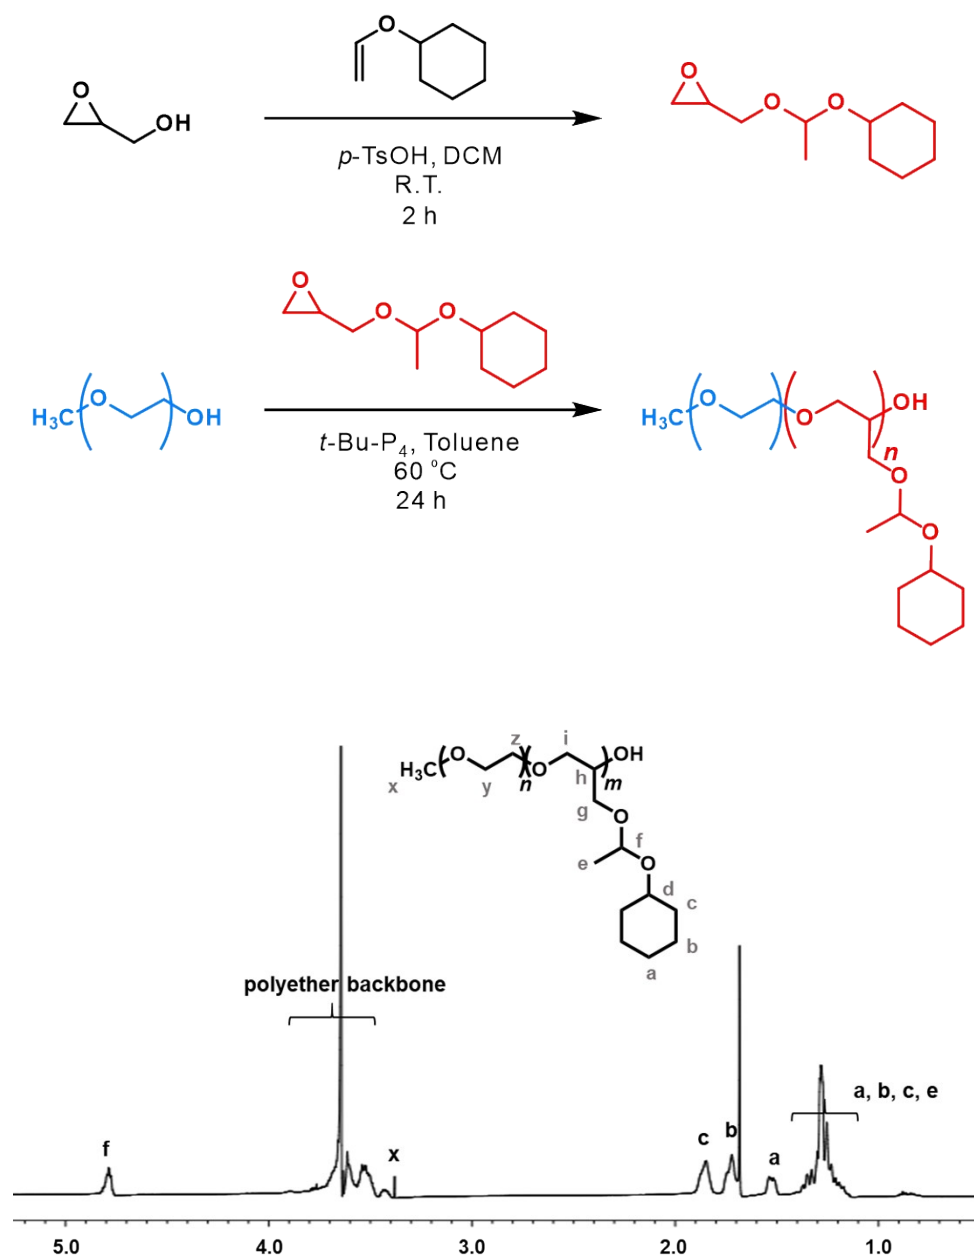

Figure S6. A synthetic route of PEG-PCHGE and its NMR spectrum.

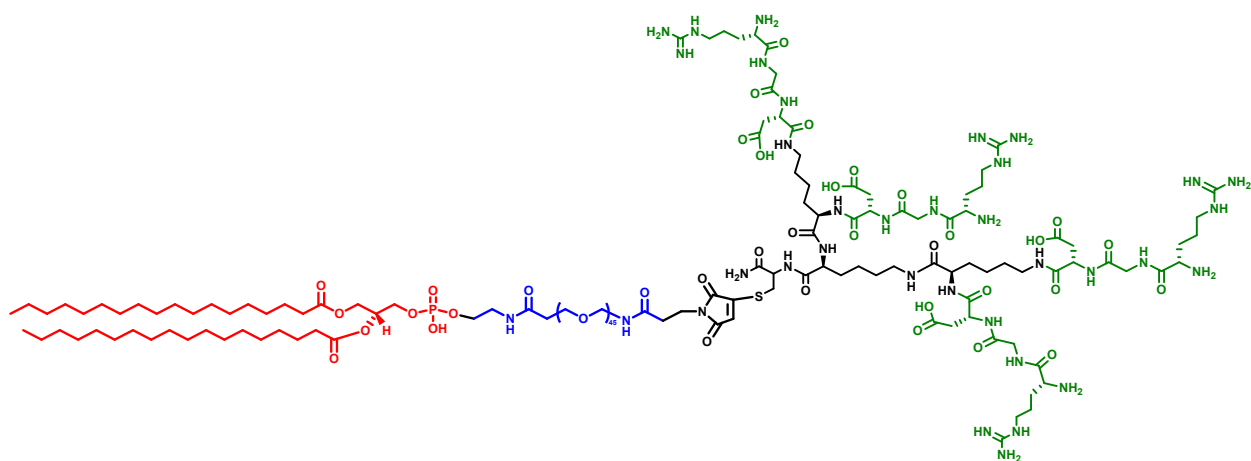

Figure S7. Chemical structure of DSPE-PEG-RGD.



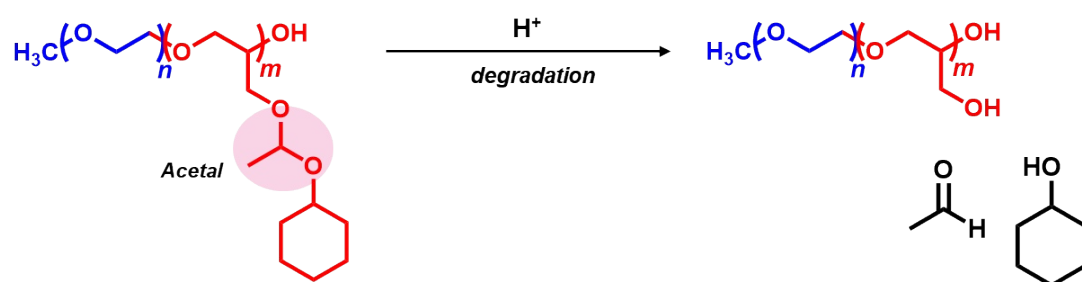

Figure S8. Chemical structure of PEG-PCHGE and acid-triggered degradation.

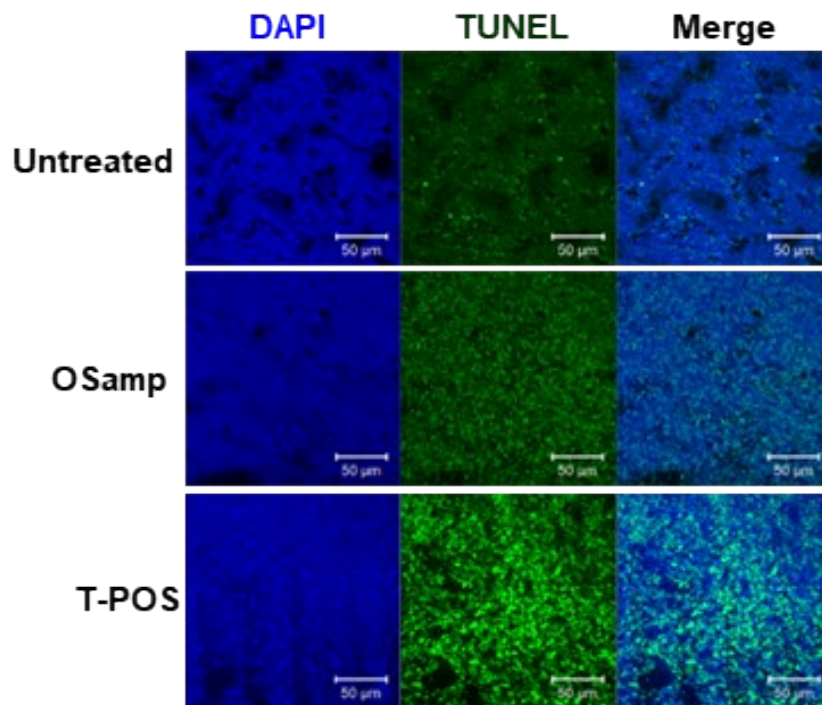

Figure S9. Fluorescence images of tumor tissues stained with DAPI and TUNEL.

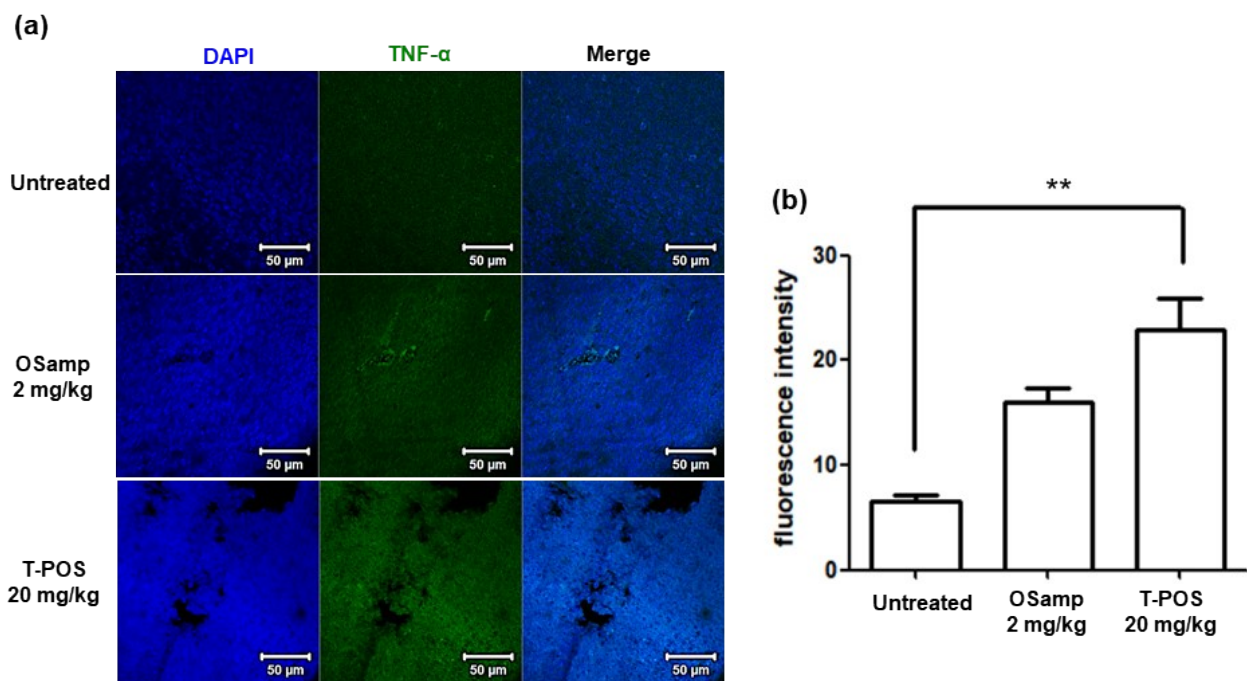

Figure S10. Expression of TNF- $\alpha$  in tumor tissues. (a) Fluorescence images of tumor tissues stained with TNF- $\alpha$  antibody. (b) Quantification of TNF- $\alpha$  expressed in tumor tissues. \*\* $p < 0.01$ , Values are presented as the mean  $\pm$  SD (n=3).

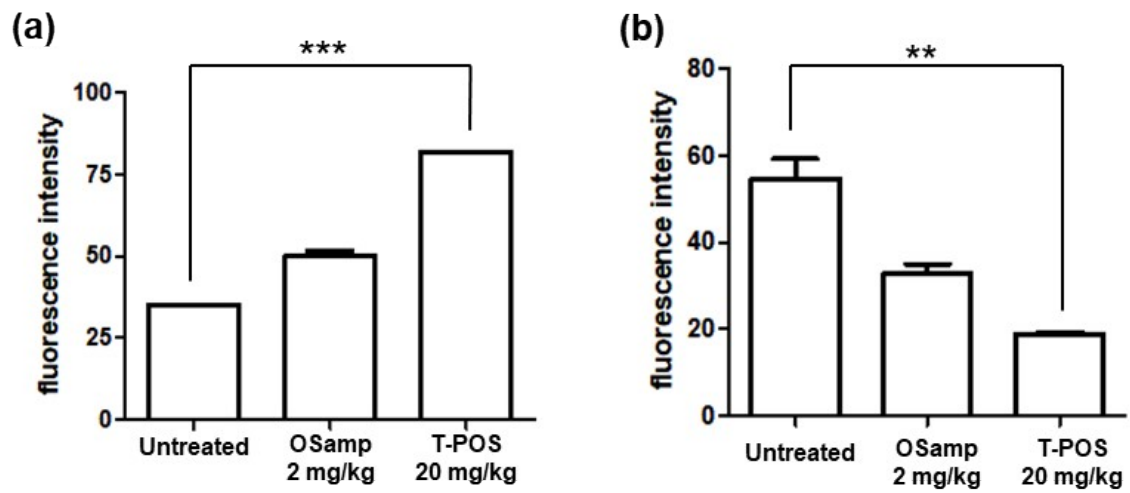

Figure S11. Quantification of the level of (a) CRT and (b) HMGB1 in tumor tissues. \*\*\* $p < 0.001$ . Values are presented as the mean  $\pm$  SD (n=3).
